# Supplementary material for: Relationship Between Government Expenditures on Health and Residents' Consumption: New Evidence From China Based on the Bootstrap Rolling-Window Causality Test
Source: Front Public Health. 2021 Jul 23;9:710147. doi: 10.3389/fpubh.2021.710147 (PMC8345323; doi:10.3389/fpubh.2021.710147)
Supplement: Supplementary file 1 [file Table_1.XLSX]

## Sheet: Sheet1
	G.E.H.	R.C.
2009-01-31	58.42	7488.3
2009-02-28	69.1	7013.7
2009-03-31	102.91	6685.8
2009-04-30	146.1	6672.5
2009-05-31	98.4	7157.5
2009-06-30	174.49	7026
2009-07-31	141.87	6998.2
2009-08-31	149.01	7116.6
2009-09-30	169.7	7668.4
2009-10-31	133.08	8263
2009-11-30	175.77	8104.7
2009-12-31	160.66	9015.3
2010-01-31	94.01	9077.3
2010-02-28	79.49	8354.7
2010-03-31	150.39	8123.2
2010-04-30	158.32	8142
2010-05-31	170.22	8703.5
2010-06-30	231.26	8642
2010-07-31	181.8	8628.8
2010-08-31	190.4	8767.7
2010-09-30	251.9	9446.5
2010-10-31	205.1	10082.7
2010-11-30	235.8	9790.8
2010-12-31	218.89	10728.5
2011-01-31	120.62	10756.6
2011-02-28	127.97	9323.8
2011-03-31	215.51	9317.6
2011-04-30	246.39	9343.2
2011-05-31	241.59	10028.4
2011-06-30	336.05	9941.6
2011-07-31	269.23	9936.5
2011-08-31	201.11	10115.6
2011-09-30	285.1	10912.8
2011-10-31	210.28	11717.6
2011-11-30	309.99	11339
2011-12-31	281.17	12610
2012-01-31	117.31	12718.1
2012-02-29	134.11	12334.2
2012-03-31	242.7	11321.7
2012-04-30	322.7	11510.4
2012-05-31	321.61	12455.1
2012-06-30	382.19	12329.9
2012-07-31	285.32	12252.8
2012-08-31	355.03	12569.8
2012-09-30	474.32	13536.5
2012-10-31	342.4	14284.8
2012-11-30	581.36	13910.9
2012-12-31	440.25	15329.5
2013-01-31	215.53	15249
2013-02-28	343.62	13769.1
2013-03-31	398.7	13588
2013-04-30	464.29	13649
2013-05-31	561.65	14696.8
2013-06-30	659.75	14565.1
2013-07-31	474.08	14408
2013-08-31	492.29	14705
2013-09-30	544.29	15865.1
2013-10-31	467.56	16546.4
2013-11-30	602.14	16128.9
2013-12-31	572.23	17739.7
2014-01-31	253.23	17222.1
2014-02-28	371.43	15620.1
2014-03-31	668.31	15650.2
2014-04-30	492.76	15603.1
2014-05-31	571.87	16714.8
2014-06-30	753.7	16584.9
2014-07-31	550.75	16314.9
2014-08-31	562	16658.9
2014-09-30	710.6	18226.6
2014-10-31	479.4	18933.8
2014-11-30	612.66	18476.7
2014-12-31	1172.32	20334.2
2015-01-31	346.68	17121.3
2015-02-28	405.93	17426.2
2015-03-31	827.21	17641.2
2015-04-30	716.88	17600.3
2015-05-31	659.68	18886.3
2015-06-30	850.1	18826.7
2015-07-31	564.13	18513.2
2015-08-31	551.84	18886.2
2015-09-30	734.56	20653.3
2015-10-31	567.98	21491.3
2015-11-30	608.45	21011.9
2015-12-31	1375.56	23059.7
2016-01-31	505.22	19220.7
2016-02-29	526.32	19690.1
2016-03-31	1140.74	19800.5
2016-04-30	773.97	19701.2
2016-05-31	884.22	21249.8
2016-06-30	1074.21	21166.5
2016-07-31	627.03	20775.8
2016-08-31	608.52	21133.9
2016-09-30	848.77	23042.4
2016-10-31	570.45	23967.2
2016-11-30	710.68	23474.7
2016-12-31	1815.87	25801.3
2017-01-31	509.66	22112.2
2017-02-28	657.92	22512.3
2017-03-31	1294.32	22722.8
2017-04-30	1004.7	22386.7
2017-05-31	995.68	24194.8
2017-06-30	1338.79	24280.3
2017-07-31	791.73	24338.8
2017-08-31	742.56	24893.4
2017-09-30	1055.12	25270.6
2017-10-31	724.55	28278.9
2017-11-30	957.47	27937.3
2017-12-31	1843.5	28634.6
2018-01-31	652.61	24251.2
2018-02-28	809.83	25100.9
2018-03-31	1712.24	25114.1
2018-04-30	1066.58	24645.8
2018-05-31	1165.69	26610.7
2018-06-30	1771.31	26857.4
2018-07-31	736.36	26827.4
2018-08-31	872.52	27539.6
2018-09-30	1377.29	27976.4
2018-10-31	627.96	31119.2
2018-11-30	1182.57	30958.5
2018-12-31	1179.04	31756.8
2019-01-31	842.27	27123.2
2019-02-28	1007.83	27256.8
2019-03-31	2256.37	27863.7
2019-04-30	1042.09	27278.5
2019-05-31	1305.51	29459.2
2019-06-30	2168.9	29807.6
2019-07-31	763.73	29609.8
2019-08-31	927.31	30329.7
2019-09-30	1519.49	30870.3
2019-10-31	503.11	34240.9
2019-11-30	992.26	34108.2
2019-12-31	1271.13	34734.1
2020-01-31	947.6	28736.5
2020-02-29	1180.15	29178.4
2020-03-31	2298.46	29193.6
2020-04-30	1112.94	28541.9
2020-05-31	1391.92	30359.1
2020-06-30	2541.2	30841.6
2020-07-31	751	30733.7
2020-08-31	927.44	31542.3
2020-09-30	1614.8	32005.4
2020-10-31	516.9	35534.4
2020-11-30	821.23	35259.7
2020-12-31	1596.27	35893.5
